# Supplementary material
Source: PubMed Central journal article supplement (PMC4630010)
Supplement: NIHMS733304-supplement-Suppporting_Information.pdf [file NIHMS733304-supplement-Suppporting_Information.pdf]

# Supporting Information

## Lewis Acid-Induced Change from Four- to Two-Electron Reduction of Dioxygen Catalyzed by Copper Complexes Using Scandium Triflate

Saya Kakuda,<sup>†</sup> Clarence J. Rolle,<sup>‡</sup> Kei Ohkubo,<sup>†</sup> Maxime A. Siegler,<sup>‡</sup> Kenneth D. Karlin,<sup>\*,‡</sup> and Shunichi Fukuzumi<sup>\*,†</sup>

<sup>†</sup>*Department of Material and Life Science, Division of Advanced Science and Biotechnology, Graduate School of Engineering, Osaka University, Suita, Osaka 565-0871, Japan*

<sup>‡</sup>*Department of Chemistry, The Johns Hopkins University, Baltimore, MD 21218, USA*

\* To whom correspondence should be addressed.

E-mail: fukuzumi@chem.eng.osaka-u.ac.jp; karlin@jhu.edu

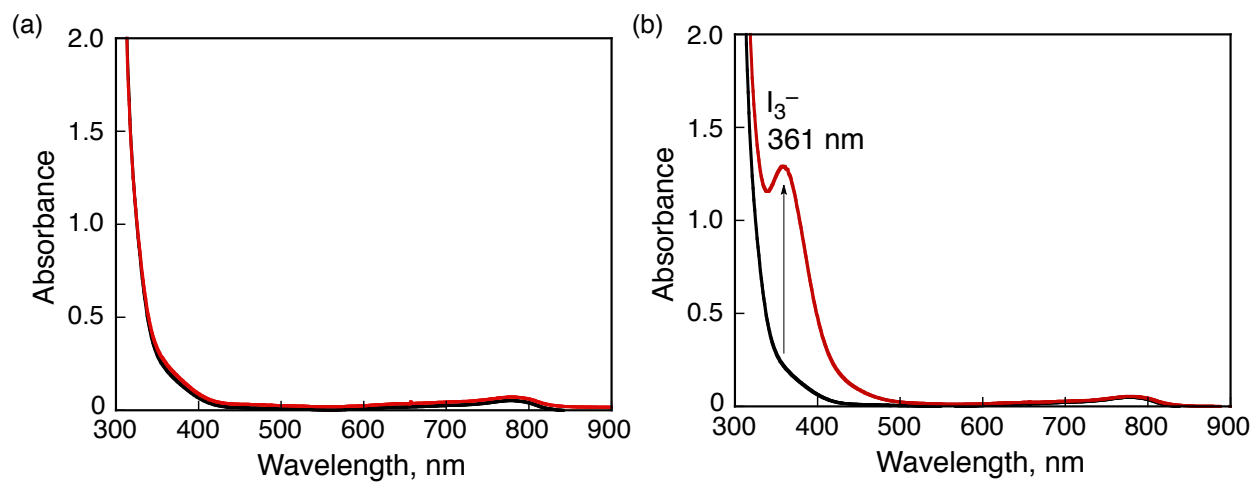

**Figure S1.** Spectral changes in the reaction of NaI (0.30 M) and 20 times diluted of reduced product of  $O_2$  (0.5 mM) in a 298K acetone solution including  $Fc^{*+}$  (2.0 mM),  $[(tmpa)Cu^{II}]^{2+}$  ( $4.0 \times 10^{-5}$  M), and (a) HOTf (2.0 mM) or (b)  $Sc(OTf)_3$  (2.0 mM)

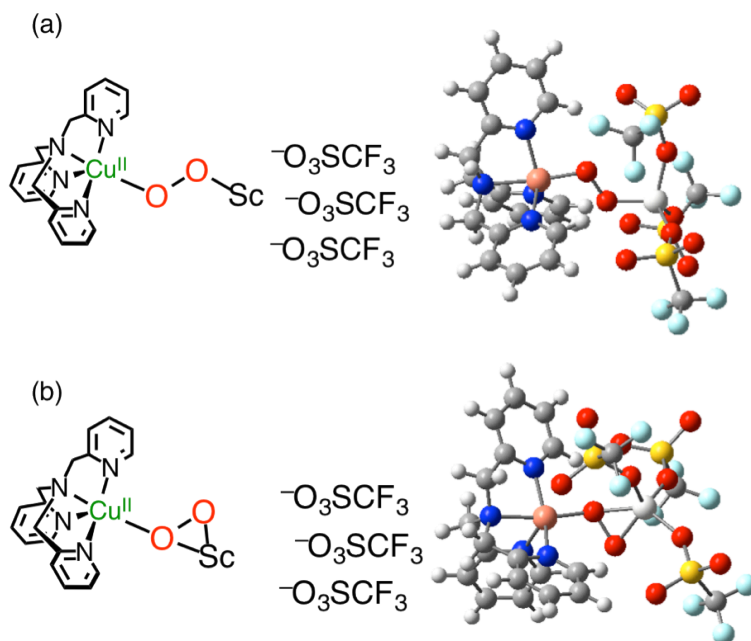

**Figure S2.** Optimized structures of  $[(\text{tmpa})\text{Cu}^{\text{II}}\text{OOSc}(\text{OTf})_3]$  obtained by DFT calculations with the UCAM-B3LYP density-functional and the Lanl2dz basis set. The SOMO orbital is shown in the right panel. (a) The end-on peroxo complex is  $19 \text{ kcal mol}^{-1}$  more stable than (b) the side-on peroxo complex.

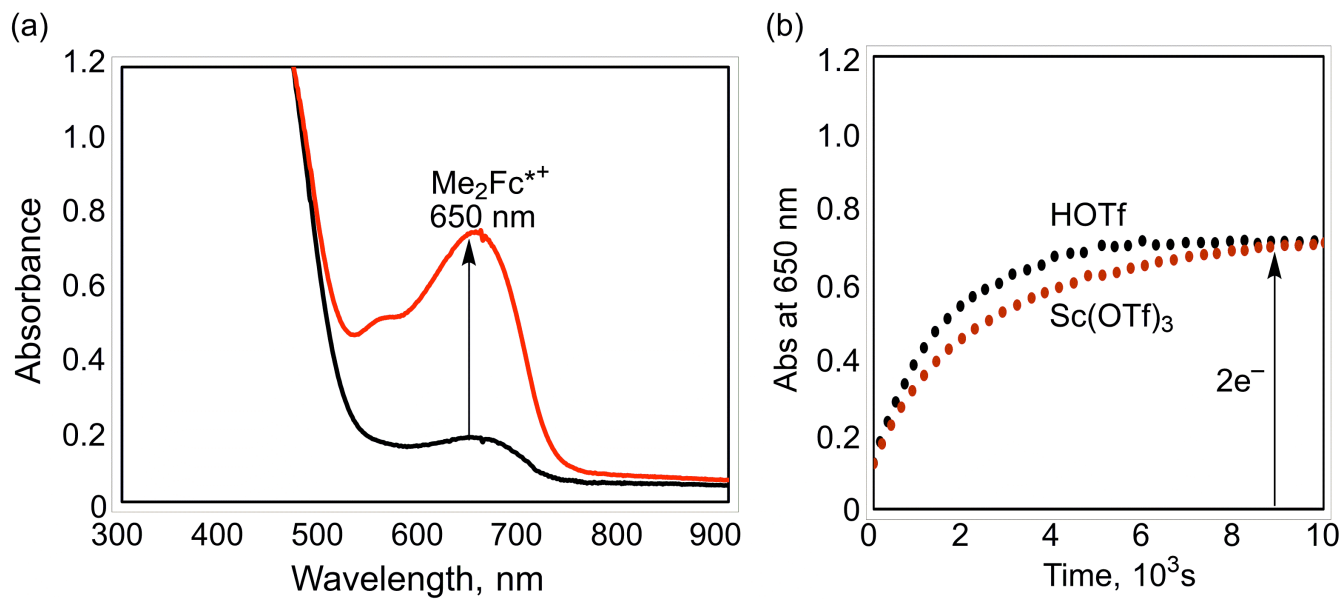

**Figure S3.** (a) UV-vis spectral changes observed in the two-electron reduction of O<sub>2</sub> (0.9 mM) by Me<sub>2</sub>Fc\* (10 mM) with Sc(OTf)<sub>3</sub> (10 mM) (red line) and with HOTf (10 mM) (black line), respectively, catalyzed by **1** (40 mM) in acetone at 298 K. (b) Time courses at 650 nm for formation of Me<sub>2</sub>Fc<sup>+</sup> with Sc(OTf)<sub>3</sub> (red dots) and HOTf (black dots).

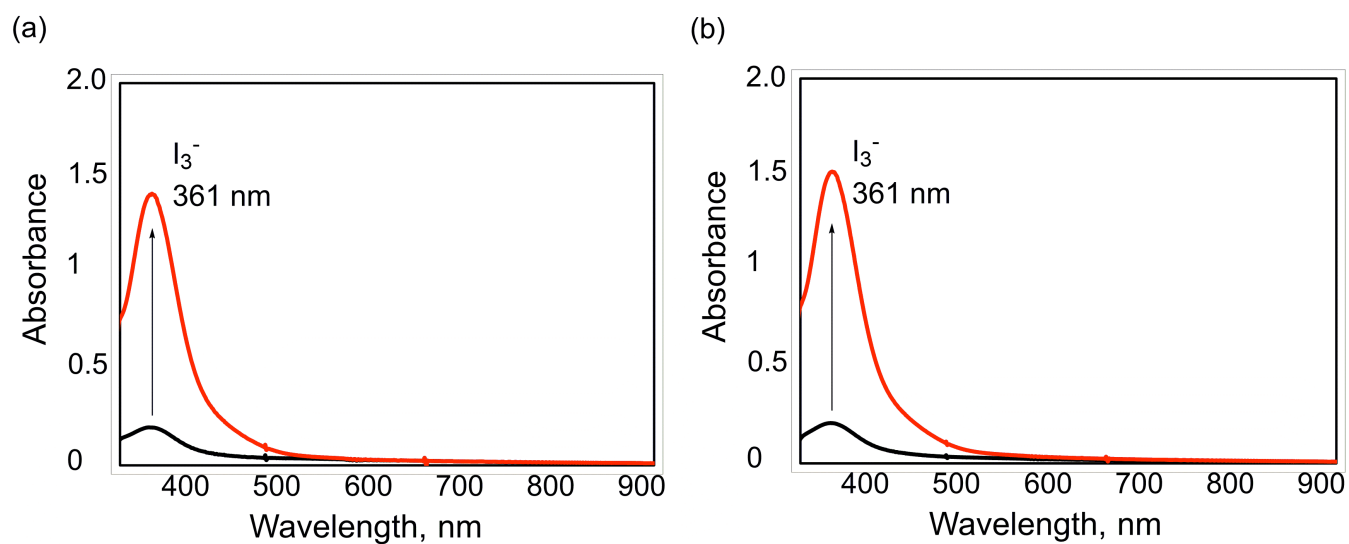

**Figure S4.** Spectral changes observed in the reaction of NaI (0.30 M) and 20 times diluted of reduced product of  $O_2$  (11 mM) in a 298K acetone solution including  $Me_2Fc^{*+}$  (2.0 mM),  $[(Cu^{II}BzQ)]^{2+}$  (0.20 mM), and (a) HOTf (0.50 mM) or (b)  $Sc(OTf)_3$  (0.50 mM)

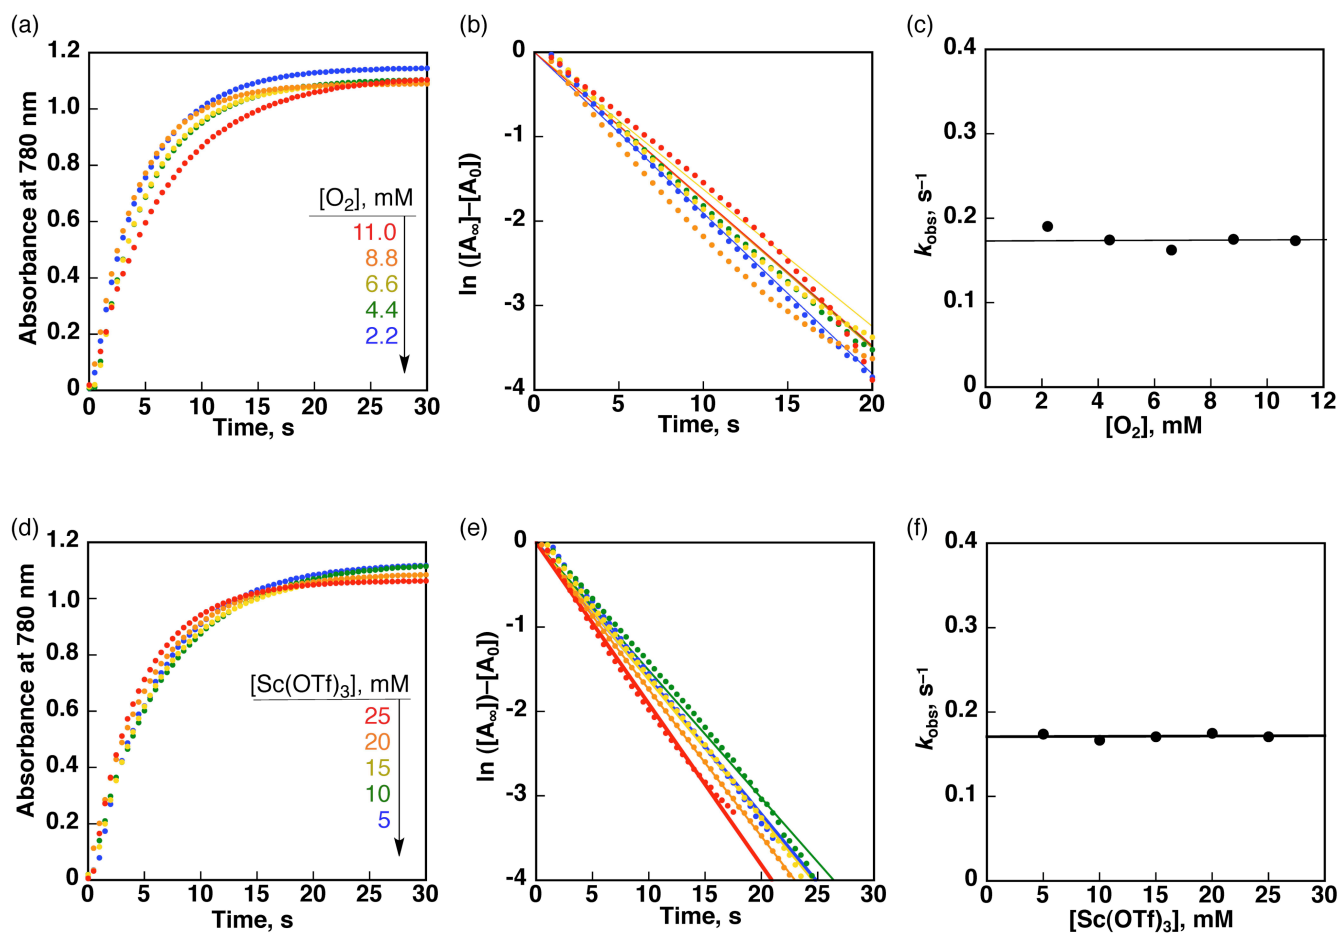

**Figure S5.** (a) Time profiles of formation of  $\text{Fc}^{*+}$  monitored by absorbance at 780 nm ( $\epsilon = 500 \text{ M}^{-1} \text{ s}^{-1}$ ) in electron transfer oxidation of  $\text{Fc}^*$  (2.0 mM) by  $\text{O}_2$  (2.2 - 11 mM), catalyzed by  $[(\text{tmpa})\text{Cu}^{\text{II}}]^{2+}$  (**1**) (0.002 mM) in the presence of  $\text{Sc}(\text{OTf})_3$  (10 mM) in acetone at 298 K. (b) Pseudo-first order plots. (c) Plots of  $k_{\text{obs}}$  vs  $[\text{O}_2]$ . (d) Time profiles of formation of  $\text{Fc}^{*+}$  in electron transfer oxidation of  $\text{Fc}^*$  (2.0 mM) by  $\text{O}_2$  (11 mM), catalyzed by  $[(\text{tmpa})\text{Cu}^{\text{II}}]^{2+}$  (**1**) (0.002 mM) in the presence of  $\text{Sc}(\text{OTf})_3$  (5 - 25 mM) in acetone at 298 K. (e) Pseudo-first order plots. (f) Plot of  $k_{\text{obs}}$  vs  $[\text{O}_2]$ .

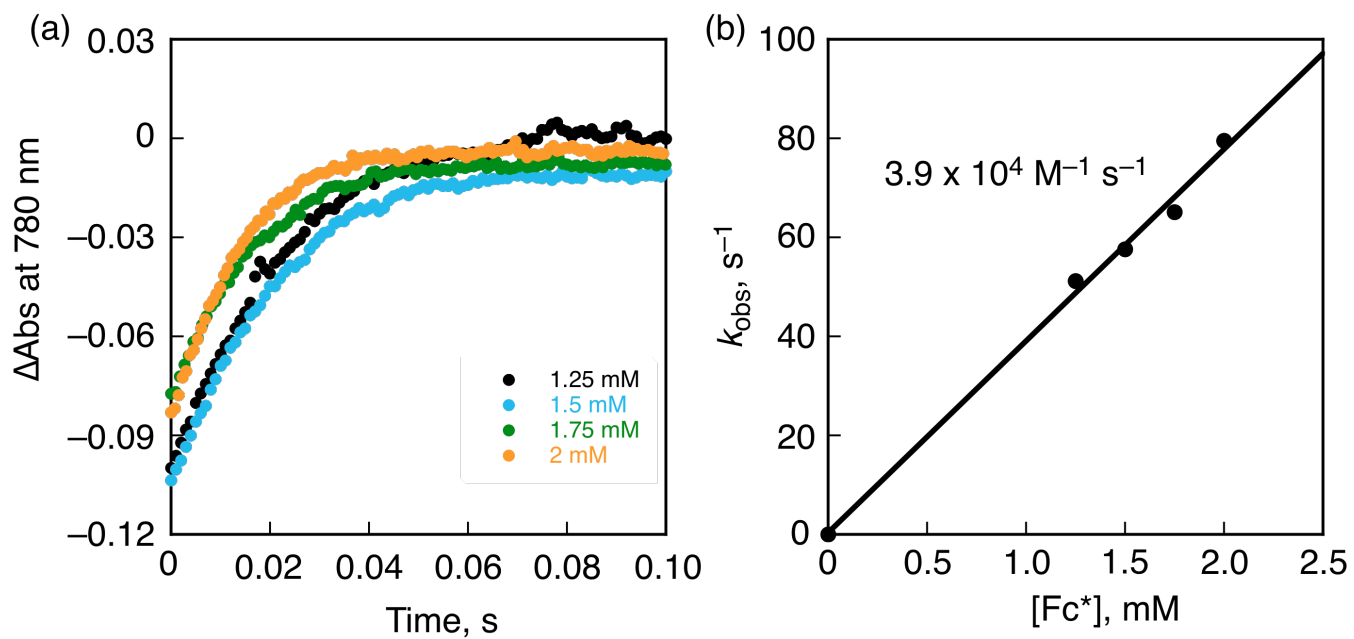

**Figure S6.** (a) Time courses of difference absorption spectra observed in electron transfer from  $\text{Fc}^*$  (1.25, 1.50, 1.75 and 2.00 mM) to **1** in the presence of  $\text{Sc}(\text{OTf})_3$  in argon saturated acetone at 298 K. (b) Plot of pseudo-first-order rate constant vs  $[\text{Fc}^*]$ .

Derivation of  $k_{\text{cat}} = 2k_{\text{et}}$

According to Scheme 1, where the rate-determining step is electron transfer from  $\text{Fc}^*$  to  $[(\text{tmpa})\text{Cu}^{\text{II}}]^{2+}$ , the rate of formation of  $\text{Fc}^{*+}$  is given by eq S1,

$$d[\text{Fc}^{*+}]/dt = 2k_{\text{et}}[\text{Fc}^*][\text{Cu}^{\text{II}}] \quad (\text{S1})$$

where  $k_{\text{et}}$  is the rate constant of electron transfer from  $\text{Fc}^*$  to  $[(\text{tmpa})\text{Cu}^{\text{II}}]^{2+}$ . Thus, the observed second-order rate constant  $k_{\text{obs}} = 2k_{\text{et}}$ , because two equivalents of  $\text{Fc}^{*+}$  are formed once electron transfer from  $\text{Fc}^*$  to  $[(\text{tmpa})\text{Cu}^{\text{II}}]^{2+}$  occurs, followed by the fast reaction of  $[(\text{tmpa})\text{Cu}^{\text{I}}]^+$  with  $\text{O}_2$  and rapid electron transfer from  $\text{Fc}^*$  to  $[(\text{tmpa})\text{Cu}(\text{O}_2^{\cdot-})]$  with  $\text{Sc}^{3+}$  to produce another equivalent of  $\text{Fc}^{*+}$  in Scheme 1.
